# Supplementary material for: Gap junctions contribute to anchorage-independent clustering of breast cancer cells
Source: Springer Nature journal article supplement (doi:10.1186/s12885-018-4148-5), 2018-02-26

Untreated

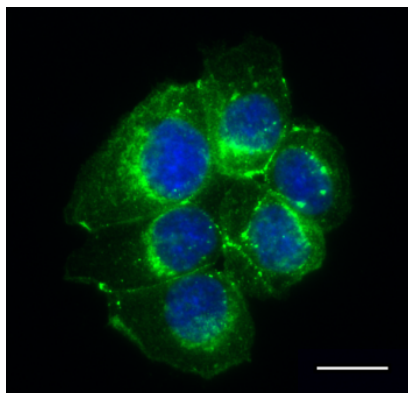

Brefeldin A 1 $\mu$ M

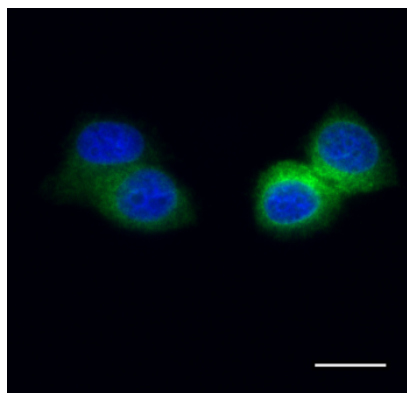

Latrunculin A

100nM

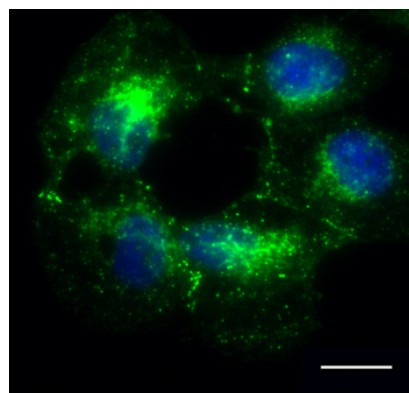

400nM

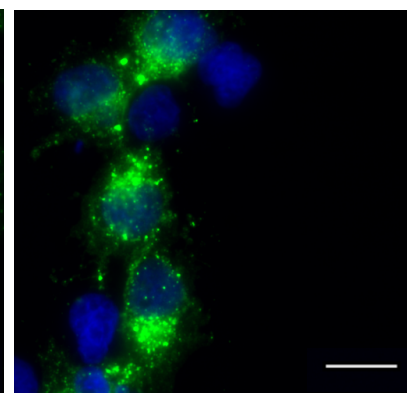

Supplement: MOESM3 [file 15494762]
